# Supplementary material for: Mutational Landscape of CEBPA in Mexican Pediatric Acute Myeloid Leukemia Patients: Prognostic Implications
Source: PubMed Central journal article supplement (PMC9367218; doi:10.3389/fped.2022.899742), 2022-07-11
Supplement: Data_Sheet_1.pdf [file Data_Sheet_1.pdf]

## *Supplementary material*

### 1.0 Supplementary tables

To analyze the socioeconomic status (SES) by maternal years of education as an indicator (Table S1), the categorization used was: (0–9 years (low SES), 9.1–12.9 years [reference category],  $\geq 13$  years of education (high SES)).

Two-sided Fisher’s exact test was used, and a  $p$ -value  $< 0.05$  was considered statistically significant. Calculations were performed with the SPSS software package, SPSS v21 (Chicago, IL, USA).

**Table S1.** Analysis of the socioeconomic status in the study population. In (A) was compared the 3 SES levels with  $CEBPA^{POS}$  and  $CEBPA^{NEG}$  patients, and the results of association were not statistically significant ( $p=0.99$ ). In (B) were compared the 3 SES levels with the death variable (yes or not), and the results of association were not statistically significant ( $p=0.76$ ).

(A)

|                                            |                             |                          | CEBPA status |          | Total |
|--------------------------------------------|-----------------------------|--------------------------|--------------|----------|-------|
|                                            |                             |                          | negative     | positive |       |
| Socioeconomic status by maternal education | 9.1 - 12.9 years of study   | Recuento                 | 18           | 2        | 20    |
|                                            |                             | % dentro de CEBPA status | 25.0%        | 28.6%    | 25.3% |
|                                            | 0 - 9 years of study        | Recuento                 | 35           | 3        | 38    |
|                                            |                             | % dentro de CEBPA status | 48.6%        | 42.9%    | 48.1% |
|                                            | more than 13 years of study | Recuento                 | 19           | 2        | 21    |
|                                            |                             | % dentro de CEBPA status | 26.4%        | 28.6%    | 26.6% |
| Total                                      | Recuento                    | 72                       | 7            | 79       |       |
|                                            | % dentro de CEBPA status    | 100.0%                   | 100.0%       | 100.0%   |       |

**Fisher’s exact test: 0.99**

**(B)**

|                                               |                             |                   | Death  |        | Total  |
|-----------------------------------------------|-----------------------------|-------------------|--------|--------|--------|
|                                               |                             |                   | no     | yes    |        |
| Socioeconomic status by<br>maternal education | 9.1 - 12.9 years of study   | Recuento          | 13     | 7      | 20     |
|                                               |                             | % dentro de Death | 28.3%  | 21.2%  | 25.3%  |
|                                               | 0 - 9 years of study        | Recuento          | 22     | 16     | 38     |
|                                               |                             | % dentro de Death | 47.8%  | 48.5%  | 48.1%  |
|                                               | more than 13 years of study | Recuento          | 11     | 10     | 21     |
|                                               |                             | % dentro de Death | 23.9%  | 30.3%  | 26.6%  |
| Total                                         |                             | Recuento          | 46     | 33     | 79     |
|                                               |                             | % dentro de Death | 100.0% | 100.0% | 100.0% |

**Fisher's exact test: 0.76**

**Chi-square test: 0.71**

**Table S2.** Novel mutations of the CEBPA gene and their classification according to the ACMG criteria, in Mexican patients with pediatric AML.

| Patient ID | Coding consequence | cDNA ( NM_004364)       | Protein consequence      | VF(%) | COSMIC ID | ACMG Varsome                            |
|------------|--------------------|-------------------------|--------------------------|-------|-----------|-----------------------------------------|
| M160       | inframe_24         | c.918_919ins24          | p.Arg306_Asn307ins8      | 42.8  | novel     | Likely Pathogenic ( PM2, PM4, PM1, PP3) |
| M138       | inframe_3          | c.946_947insGGA         | p.Glu316delinsGlyLys     | 48.2  | novel     | Pathogenic ( PM1, PM2, PM4, PP3)        |
| M173       | frameshift         | c.180_183delGTCC        | p.Ile62Thrfs*97          | 44.8  | novel     | Pathogenic (PVS1, PM2)                  |
| M173       | inframe_6          | c.926_932delAGACGCAinsT | p.Glu309_Gln311delinsVal | 42.7  | novel     | Pathogenic ( PM1, PM2, PM4, PP3)        |
| M162       | frameshift         | c.292delA               | p.Thr98Argfs*62          | 94.4  | novel     | Likely Pathogenic (PVS1, PM2)           |
| M132       | frameshift         | c.426delG               | p.Arg142Serfs*18         | 48.7  | novel     | Likely Pathogenic (PVS1, PM2)           |
| M168       | inframe_3          | c.334_336delCCC         | p.Pro112del              | 1.3   | novel     | VUS (PM2, PM4)                          |
| M183       | inframe_3          | c.564_566dupGCC         | p.Pro189dup              | 1.2   | novel     | VUS (PM2, PP3)                          |

Abbreviations: VF: Variant Fraction. COSMIC: Catalogue Of Somatic Mutations In Cancer. ACMG: American College of Medical Genetics and Genomics. NM\_004364 was used for variant annotation

## 2.0 Supplementary figures

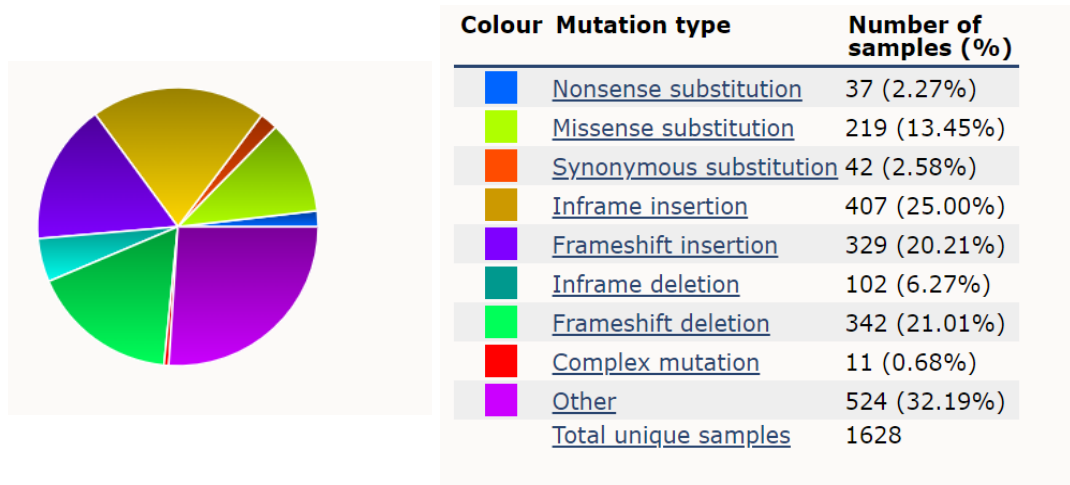

**Figure S1.** Summary of somatic mutations identified in the *CEBPA* gene across different cancers according to the COSMIC database (as of June 2022). Frameshift deletions and inframe insertions, are the most frequent mutations type, representing 46% of all kinds of mutations in *CEBPA* across different tumors. COSMIC (Catalogue Of Somatic Mutations In Cancer), (<https://cancer.sanger.ac.uk/cosmic/gene/analysis?ln=CEBPA#variants>).
